# Supplementary material for: Phylogeny and Historical Biogeography of Asian Pterourus Butterflies (Lepidoptera: Papilionidae): A Case of Intercontinental Dispersal from North America to East Asia
Source: PLoS One. 2015 Oct 20;10(10):e0140933. doi: 10.1371/journal.pone.0140933 (PMC4617649; doi:10.1371/journal.pone.0140933)
Supplement: S4 Table — (XLSX) [file pone.0140933.s009.xlsx]

## Sheet: S4_Table
node No.	estimated age	min.	max.
1	1.81	0.86	3.01
2	3.54	2.07	5.28
3	5.2	3.19	7.64
4	8.03	5	11.25
5	12.89	9.38	16.67
6	16.27	12.49	20.42
7	0.67	0.24	1.31
8	18.04	14.13	22.18
9	7.47	4.6	10.49
10	12.18	8.89	15.7
11	18.08	14.43	22.06
12	20.67	17.19	24.55
13	10.79	7.86	13.98
14	12.43	9.52	15.54
15	10.54	6.65	14.55
16	14.26	11.27	17.46
17	15.84	12.65	19.23
18	15.16	10.9	19.41
19	18.76	15.08	22.52
20	22.63	18.93	26.58
21	7.05	4.71	9.5
22	9.66	7.08	12.33
23	12.06	9.34	15.04
24	9.41	5.95	13.26
25	14.52	10.48	18.56
26	17.8	14.2	21.47
27	19.55	16.29	23.05
28	24.04	20.38	28.08
29	26.09	22.35	30.31
30	4.04	2.33	6.02
31	11.92	8.79	15.54
32	9.49	5.82	13.94
33	19.59	15.18	23.92
34	21.87	17.47	26.39
35	27.93	23.86	32.44
36	43.52	38.63	49.28
37	49.8	45.94	55.38
38	39.88	30.83	47.86
39	57.34	51.77	64.71
40	69.12	61.45	78.38
